# Supplementary material
Source: Springer Nature journal article supplement (https://www.springermedizin.de/resource/supplementary/13012_2014_788_MOESM5_ESM.pdf/9630694)
Supplement: MOESM5 [file 9630694]

# Guidelines updating System

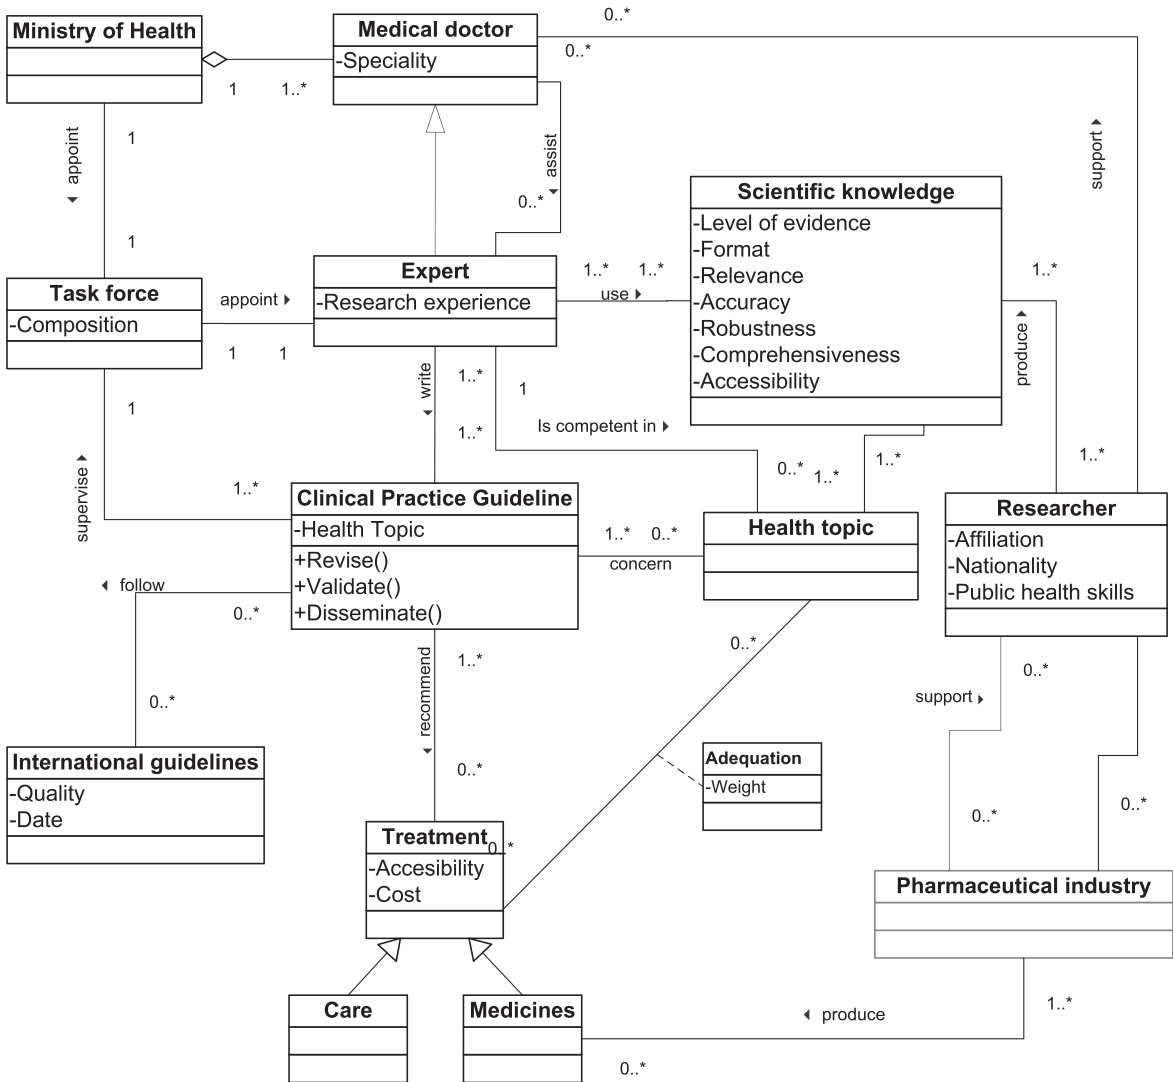

## Legend

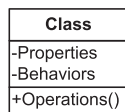

**Class:** abstraction of objects which share common properties (attributes) and behaviors (operations)

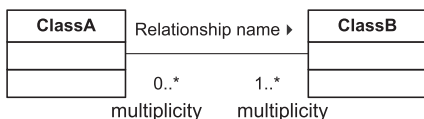

**Relationship:** Class A has a relationship with Class B

**Multiplicity:** indicates the number of possible instances

0..\* means "zero-to-many"

1..\* means "one-to-many"

Here, none to many objects of Class A is/are linked to at least one object from Class B

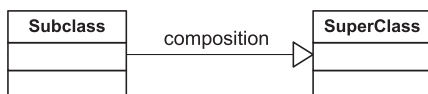

**Relation of Composition:** Class A belongs to Class B

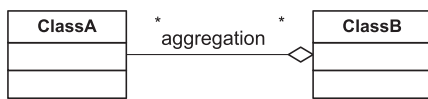

**Relation of Aggregation:** there is a part-of relationship between Class A (whole) and Class B (part)
